# Gelam Honey Attenuates Carrageenan-Induced Rat Paw Inflammation via NF- $\kappa$ B Pathway

Saba Zuhair Hussein<sup>1</sup>, Kamaruddin Mohd Yusoff<sup>2</sup>, Suzana Makpol<sup>1</sup>, Yasmin Anum Mohd Yusof<sup>1\*</sup>

<sup>1</sup> Department of Biochemistry, Faculty of Medicine, Universiti Kebangsaan Malaysia, Kuala Lumpur, Malaysia, <sup>2</sup> Department of Molecular Biology and Genetics, Faculty of Arts and Science, Canik Basari University, Samsun, Turkey

## Abstract

The activation of nuclear factor kappa B (NF- $\kappa$ B) plays a major role in the pathogenesis of a number of inflammatory diseases. In this study, we investigated the anti-inflammatory mechanism of Gelam honey in inflammation induced rats via NF- $\kappa$ B signalling pathway. Rats paw edema was induced by subplantar injection of 1% carrageenan into the right hind paw. Rats were pre-treated with Gelam honey at different doses (1 or 2 g/kg, p.o.) and NSAID Indomethacin (10 mg/kg, p.o.), in two time points (1 and 7 days). Our results showed that Gelam honey at both concentrations suppressed the gene expressions of NF- $\kappa$ B (p65 & p50) and I $\kappa$ B $\alpha$  in inflamed rats paw tissues. In addition, Gelam honey inhibited the nuclear translocation and activation of NF- $\kappa$ B and decreased the cytosolic degradation of I $\kappa$ B $\alpha$  dose dependently in inflamed rats paw tissues. The immunohistochemical expressions of pro-inflammatory mediators COX-2 and TNF- $\alpha$  were also decreased in inflamed rats paw tissues when treated with Gelam honey. The results of our findings suggest that Gelam honey exhibits its inhibitory effects by attenuating NF- $\kappa$ B translocation to the nucleus and inhibiting I $\kappa$ B $\alpha$  degradation, with subsequent decrease of inflammatory mediators COX-2 and TNF- $\alpha$ .

**Citation:** Hussein SZ, Mohd Yusoff K, Makpol S, Mohd Yusof YA (2013) Gelam Honey Attenuates Carrageenan-Induced Rat Paw Inflammation via NF- $\kappa$ B Pathway. PLoS ONE 8(8): e72365. doi:10.1371/journal.pone.0072365

**Editor:** Bruno Lourenco Diaz, Universidade Federal do Rio de Janeiro, Brazil

**Received:** April 18, 2013; **Accepted:** July 16, 2013; **Published:** August 28, 2013

**Copyright:** © 2013 Hussein et al. This is an open-access article distributed under the terms of the Creative Commons Attribution License, which permits unrestricted use, distribution, and reproduction in any medium, provided the original author and source are credited.

**Funding:** This research was supported financially by the Fundamental Research Grant Scheme, (FF-03-FRG50039-2010) Universiti Kebangsaan Malaysia, and Universiti Kebangsaan Malaysia Fundamental Fund (FF-156-2010). The funders had no role in study design, data collection and analysis, decision to publish, or preparation of the manuscript.

**Competing Interests:** The authors have declared that no competing interests exist.

\* E-mail: anum@medic.ukm.my; rahmatyasmin@yahoo.com

## Introduction

Honey is a sweet and flavorful natural product of honey bees that is derived from floral nectars and other plant secretions [1]. The major component of honey is a complex mixture of sugars such as glucose, fructose and sucrose with small amount of other constituents including minerals, proteins, amino acids, enzymes, organic acids, vitamins, phenolic compounds [2]. For centuries, honey has been used for nutrition in different cultures and it has also been used as a traditional medicine due to its healing properties [3]. It has been reported to be effective in the treatment of gastrointestinal disorders [4], wounds and burns healing [5], asthma [6], cataracts [7,8] and cancer [9]. Honey has also been shown to have antimicrobial, antiviral, antioxidant, anti-inflammatory and anticancer properties, in both *in vitro* and *in vivo* studies [10–14]. These properties are mainly attributed to the phenolic compounds in honey such as flavonoids which are recognized for their high pharmacological activities as antioxidant and radical scavengers [15,16].

Inflammation is a complex biological response of the body against infections, irritations or other injuries, cell damage and vascularized tissues and is critical for both innate and adaptive immunity [17,18]. Inflammation plays an important role in various diseases such as rheumatoid arthritis, asthma, inflammatory bowel disease, neurodegenerative diseases and cancer [19,20]. During an inflammatory response, several pro-inflammatory mediators are released, including interleukin 6 (IL-6), IL-12, tumor necrosis factor (TNF), interferon (INF- $\gamma$ ), cyclooxygenase-2

(COX-2) and inducible nitric oxide synthase (iNOS) [20,21]. These cytokines play major roles in the initiation and amplification of inflammatory processes [22]. Nuclear factor kappa B (NF- $\kappa$ B), transcription factor, also plays an important role in the inflammatory response by regulating the expression of various genes encoding pro-inflammatory mediators such as cytokines, chemokines, growth factors and inducible enzymes [23,24].

NF- $\kappa$ B family consists of five proteins: NF- $\kappa$ B1 (p50/p105), NF- $\kappa$ B2 (p52/p100), RelA (p65), RelB and c-Rel [25]. It is found in the cytoplasm in an inactive form associated with regulatory proteins called inhibitors of  $\kappa$ B (I $\kappa$ B) [26]. I $\kappa$ B kinase (IKK) complex is a key kinase which phosphorylates the protein I $\kappa$ B leading to proteasomal degradation of I $\kappa$ B and activation of the NF- $\kappa$ B [27]. Once activated, NF- $\kappa$ B is translocated to the nucleus from the cytoplasm, which then activates the genes related to inflammatory responses [28,29]. Thus, inhibition of NF- $\kappa$ B could reduce the expression of inflammatory genes and is a mechanism by which anti-inflammatory agents might elicit their anti-inflammatory effects [30]. Various natural compounds have been shown to exhibit anti-inflammatory activity through inactivation of NF- $\kappa$ B via different mechanisms. For example, Gonzales and Orlando [31] reported that curcumin and resveratrol were able to inhibit TNF- $\alpha$ -activated NF- $\kappa$ B signaling in adipocytes and significantly reduced production of cytokines TNF- $\alpha$ , IL-1 $\beta$ , IL-6 and COX-2 genes expression. Yang et al. [32] found that green tea polyphenol epigallocatechin-3-gallate (EGCG) suppresses NF- $\kappa$ B activation by inhibiting IKK activity in intestinal epithelial cell line (IEC-6).

However, to date, no study has reported the elucidation of the mechanism by which Gelam honey exhibits its anti-inflammatory effect. Our previous study has shown that Gelam honey has anti-inflammatory effects by alleviating the rat paw edema and inhibiting the expression of pro-inflammatory mediators such as iNOS, COX-2, IL-6 and TNF- $\alpha$  in inflammation-induced paw edema in rats [33]. In the present study, we investigated further the anti-inflammatory effect of Gelam honey by elucidating its possible activation of NF- $\kappa$ B signaling pathway using acute inflammation rat model.

## Materials and Methods

### Chemicals

All chemicals and reagents used were of analytical grade. Indomethacin and Carrageenan were obtained from Sigma Chemicals Co. (USA). Trisma Base, dithiothreitol (DTT), sodium dodecyl sulfate (SDS), sodium chloride (NaCl), potassium chloride (KCl), magnesium chloride (MgCl<sub>2</sub>), Tween 20, phenyl methyl-sulfonyl fluoride (PMSF) and tetramethylethylenediamine (TEMED), all were supplied by Sigma (USA). HEPES (*N*-2-hydroxyethylpiperazine-*N'*-2-ethanesulfonic acid) was from PPA Laboratories (Austria), ethylenediaminetetraacetic acid (EDTA) from Calbiochem (USA), Triton X-100 from Gainland Chemical Company (UK), skim milk from Sunlac (Malaysia), formalin from Hopkins & Williams (England), glycerol from Merck, (Germany) and chemiluminescence was supplied by Perkin Elmer (USA). The materials ethyl alcohol and Xylene were obtained from BDH (England). The membrane polyvinylidene fluoride (PVDF) was purchased from GE Healthcare (USA).

### Honey Sample and Sterilization Process

Gelam honey is produced by *Apis mellifera* bees, and the nectar and pollen were collected by the bees from the plant *Melaleuca cajuputi* Powell, also known locally as the “Gelam tree”. It was purchased from the National Apiary, Department of Agriculture, Batu Pahat, Johor, Malaysia.

Gelam honey was packed in tight cap plastic bottles and placed in a box before sending to SINAGAMA, Malaysian Nuclear Agency for sterilization process. The sterilization process was conducted using cobalt-60 source (Model JS10000, Atomic Energy of Canada Ltd, Ontario, Canada). The box which contained Gelam honey was carried into a gamma-radiation chamber and circled the cobalt-60 source for 5 times to reach the dose of 25 kGy [34]. The irradiated Gelam honey was stored in the dark at room temperature until use.

### Animal Model and Experimental Design

Male Sprague-Dawley rats (n = 84) weighing (200–300) g, were obtained from the laboratory Animals Resource Unit, Faculty of Medicine, Universiti Kebangsaan Malaysia. The rats were housed in individual cages under standard conditions (temperature at 22±2°C for 12 hours light/12 hours dark cycle) with food (standard pellet diet) and water provided *ad libitum*. The rats were acclimatized for one week within the work area environment before the experiment begins. Each rat was used only once. The experimental protocols used in this study were approved by Animal Ethics Committee of Universiti Kebangsaan Malaysia (date of approval 17th March 2010: pp/BIOK.2010/Yasmin).

Carrageenan-induced paw edema model was used for the assessment of anti-inflammatory activity [35], as described previously in Hussein et al. [33]. Briefly, two models were employed in this study, with each model consisting of seven groups (n = 6 rats for each group). The first model represents rats

that were pre-treated with Gelam honey for 1 day, while the second model represents rats that were pre-treated with Gelam honey for 7 days. In both of the models, rats were pre-treated orally with honey once daily at two different doses (1 and 2 g/kg of body weight). The negative control received an equivalent volume of vehicle (distilled water) and the positive control group received non steroidal anti-inflammatory drug (NSAID) Indomethacin (10 mg/kg of body weight) [36]. One hour after the last day of administration of Gelam honey, vehicle or Indomethacin, paw edema was induced by subplantar injection of 0.2 ml/paw of 1% freshly prepared carrageenan suspension in normal saline into the right hind paw of each rat in both models [37].

### Preparation of Tissue Samples for Western Blot and RT-PCR Analyses

Twenty-four hours after carrageenan injection, the rats were sacrificed by decapitation. Rats paw tissue segments were cut and washed in normal saline several times. The paw tissues were snap frozen in liquid nitrogen and stored at -80°C for Western blot and RT-PCR analyses.

### Primer Design and Quantitative RT-PCR

The primers sequence for rat NF- $\kappa$ B (p65 & p50), I $\kappa$ B $\alpha$  and housekeeping gene glyceraldehyde 3-phosphate dehydrogenase (GADPH) were designed from the sequence list of GeneBank database (National Centre for biotechnology Information, NCBI) and then blasted against GeneBank database sequences.

RT-PCR was performed for the detection of the mRNA expressions of NF- $\kappa$ B (p65 & p50) and I $\kappa$ B $\alpha$ . Total RNA was extracted from the tissue samples using an RNeasyMini kit (QIAGEN, USA) in an RNase-free environment, following the manufacturer's protocol. The RNA amount and purity was measured using the NanoDrop 2000 spectrophotometer (Thermo Scientific, USA). RNA (1  $\mu$ g) was reverse transcribed into single-stranded cDNA using an iScript cDNA synthesis kit (BIO-RAD, USA). Real-time PCR was carried out using SYBER Green detection (BIO-RAD, USA) in an automatic iQ5 thermocycler (BIORAD, USA). Master mixes of cDNA extract, nuclease-free H<sub>2</sub>O and SYBR Green solution were aliquot into each reaction tube which contained forward and reverse primers. The primer sequences for NF- $\kappa$ Bp65 forward: 5'- TTCCCTGAAGTG-GAGCTAGGA-3' and reverse: 5'- CATGTCGAGGAAGACACTGGA -3'; for NF- $\kappa$ Bp50 forward: 5'- AACGCATCC-CAAGGTGCTGGAA-3' and reverse: 5'- GCAGCTGGAAGCTCAAGCCA-3'; for I $\kappa$ B $\alpha$  forward: 5'- AAGGACGAGGATTACGAGCAG-3' and reverse: 5'- CCCTTCACCTGACCAATCACT -3'; for GADPH forward: 5'- TCAAGAAGGTGGTGAAGCAG-3' and reverse: 5'- AGGTGGAAGAATGGGAGTTG-3'. The cycling conditions were as follows: initial denaturation at 95°C for 3 minutes and amplification for 40 cycles (95°C for 10 seconds for the denaturation, 56°C for 30 seconds for the annealing and extension). The relative amount of gene expression, normalized to the internal control GAPDH, was calculated according to the following formula:

$$\text{Relative expression values} = 2^{(Ct_{\text{GAPDH}} - Ct_{\text{target gene}})}$$

**Where:** Ct = The cycle at threshold level.

### Preparation of Cytosolic and Nuclear Protein Extracts

Protein extracts were prepared from paw tissues as described previously by Muthusamy et al. [38], with some modification. A 30 mg paw segment was ground with liquid nitrogen until it turned to powder form. An amount of 200  $\mu$ l of a cytosolic/homogenizing buffer (10 mM HEPES, 10 mM KCL, 0.1 mM EDTA, 0.5 mM MgCl<sub>2</sub>, with freshly prepared 1 mM DTT, 0.1 mM PMSF and 1% Triton X-100, pH 7.9), was added and the homogenate was incubated in ice for 10 minutes. The homogenate was centrifuged at 5200 rpm for 5 minutes; the supernatant was collected and used as cytosolic protein extract. The nuclear pellet was collected and washed with the same volume of homogenizing buffer to remove cytosolic contaminants. Nuclear pellets were resuspended in a 100  $\mu$ l of complete lysis buffer (20 mM HEPES, 420 mM NaCl, 0.1 mM EDTA, 1.5 mM MgCl<sub>2</sub>, 25% glycerol, 1 mM DTT and 0.5 mM PMSF, pH 7.9) and incubated at 4°C with mild shaking for 15 minutes. The supernatant was collected for nuclear protein extract after centrifugation at 8200 rpm for 5 minutes. The protein contents were determined using Bradford reagent [39].

### Western Blot Analysis

The tissue lysates (cytosolic or nuclear) containing equal amount of proteins (30 or 50  $\mu$ g of total protein) were separated by 12% SDS-polyacrylamide gel and then transferred to *hybond-P* (PVDF) membrane. The membrane was blocked with 5% skim milk in TPBS solution (0.2% Tween 20 in PBS) for 1 hour. The membrane was then incubated overnight at 4°C with specific primary antibodies for the interest protein: NF- $\kappa$ Bp65 (1:500 dilution; Santa Cruz, USA), NF- $\kappa$ Bp50 (1:5000 dilution; Abcam, UK), I $\kappa$ B $\alpha$  (1:10000 dilution; Abcam, UK),  $\beta$ -actin (1:5000 dilution; Santa Cruz, USA) and Lamin B (1:200 dilution; Santa Cruz, USA). The membrane was rinsed three times with TPBS solution for 5 minutes each. Thereafter, the membrane was incubated with secondary antibody (1:3000) for 1 hour. The membrane was rinsed with TPBS solution for 5 minutes, which was repeated three times. Lastly, the membrane was incubated with 1 ml of chemiluminescence substrate for 5 minutes; the bands were visualized by Gel Documentation (Alpha Inno Tech, USA).

### Preparation of Tissue Samples for Histological Studies

The soft paw tissues were excised, fixed in 10% formalin for 24 hours and processed for paraffin embedding. Sections were cut at 3–4  $\mu$ m thickness, flattened and adhered to the slides [40].

### Hematoxylin and Eosin (H&E) Staining and Inflammation Scoring

Paraffin-embedded sections (4  $\mu$ m) were dewaxed by gradual washings in xylene followed by hydration with various concentrations of alcohol. H&E staining was performed on all samples for pathological examination. The stained sections were scored by two investigators in a blind fashion, and the degree of inflammation was evaluated according to Bang et al. [41] with a score from 0 to 5. The scores were defined as follows: 0 = no inflammation, 1 = mild inflammation, 2 = mild/moderate inflammation, 3 = moderate inflammation, 4 = moderate/severe inflammation and 5 = severe inflammation.

### Immunohistochemistry for Pro-inflammatory Mediators COX-2 and TNF- $\alpha$

After dewaxing and dehydration, the sections were heated in target retrieval solution (TRS) for 20 minutes in a water bath at 98°C [high (pH = 9) for COX-2 and low (pH = 6) for TNF- $\alpha$ ], for

antigen recovery. After cooling at room temperature for 20 minutes, the sections were immersed in 3% hydrogen peroxide for 15 minutes at room temperature to abolish endogenous peroxidase activities. The sections were incubated for 1 hour at room temperature with the primary antibodies (anti-COX-2 or anti-TNF- $\alpha$ , respectively) as 1:1000 or 1:400 dilutions in PBS-BSA. Then, the sections were washed in Tris buffer solution (TBS) and incubated for 30 minutes with secondary antibody (EnVision™ FLEX kit; Dako, Denmark). After washing with TBS, the sections were stained with 3,3'-diaminobenzidine-peroxide (DAB) chromophore, counterstained with hematoxylin, and mounted on microscope slides for analysis. Negative control was included by omitting the primary antibody, and positive controls for COX-2 and TNF- $\alpha$  were colon cancer tissues. The immunostaining for COX-2 and TNF- $\alpha$  were considered positive when the cytoplasm was stained brown. The cytoplasmic staining of COX-2 and TNF- $\alpha$  were evaluated by the percentage of positive cells according to the method of Habib et al. [42] and Lucetti et al. [40]. The mean percentage of positive staining cells was determined by counting 1000 stained cells at 10 different fields observed under 400X magnification using a light microscope [42].

### Statistical Analysis

All the data were presented as mean  $\pm$  S.E.M. (n = 6). Statistical analysis was performed by one-way analysis of variance (ANOVA) using SPSS version 16.0 software. The statistical differences at level  $p < 0.05$  were considered significant.

## Results

### Effect of Gelam Honey on NF- $\kappa$ B (p65 & p50) and I $\kappa$ B $\alpha$ Gene Expressions in Paw Tissues

The effect of Gelam honey on NF- $\kappa$ B (p65 & p50) and I $\kappa$ B $\alpha$  gene expressions in rats paw tissues were shown in **Figure 1**. The rats supplemented with Gelam honey at 1 and 2 g/kg of body weight, either 1 or 7 days, caused no significant change in p65, p50 and I $\kappa$ B $\alpha$  gene expressions compared with rats supplemented with distilled water (**Figures 1A–1C**). However, carrageenan injection led to significantly elevated levels of p65, p50 and I $\kappa$ B $\alpha$  gene expressions in the inflamed paws compared to control rats (not induced with inflammation). As shown from our results, the expression of p65, p50 and I $\kappa$ B $\alpha$  genes in inflamed rat paws were significantly ( $p < 0.05$ ) attenuated by the pre-treatment with Gelam honey (1 & 2 g/kg of body weight) in both 1 and 7 days models. Interestingly, the pre-treatment with 2 g/kg of body weight of Gelam honey for 7 days had greater effect on down-regulating the p65, p50 and I $\kappa$ B $\alpha$  gene expressions which was almost similar to the effect of the Indomethacin (10 mg/kg of body weight) (**Figures 1A–1C**).

### Effect of Gelam Honey on NF- $\kappa$ B (p65 & p50) Nuclear Translocation in Paw Tissues

The results demonstrated that carrageenan injection induced the nuclear translocation of NF- $\kappa$ B subunits p65 and p50, as shown in **Figures 2A & 2B**. However, the cytoplasmic level of p65 and p50 increased significantly by the pre-treatment with Gelam honey (1 & 2 g/kg of body weight) in both 1 and 7 days models (**Figure 2A**). Simultaneously, the nuclear levels of p65 and p50 decreased significantly with Gelam honey pre-treatment (1 & 2 g/kg of body weight) for 1 and 7 days (**Figure 2B**), with concomitant increased of their cytoplasmic levels (**Figure 2A**). Pre-treatment with 2 g/kg of body weight of Gelam honey for 7 days showed greater effect in decreasing the nuclear p65 and p50 levels in parallel with their increased cytosolic levels.



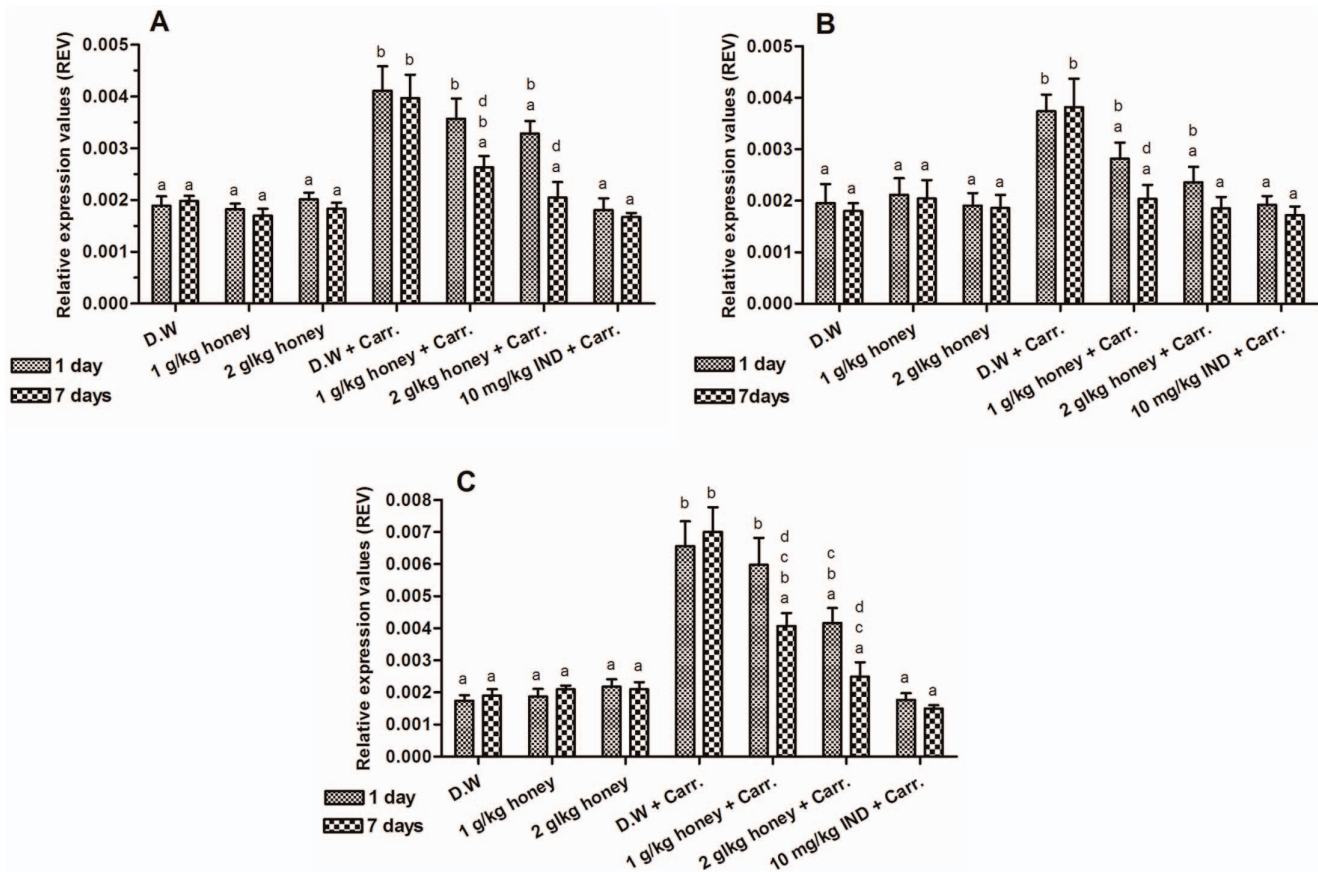

**Figure 1. The effect of Gelam honey on the gene expressions in rats paw tissues.** (A) NF- $\kappa$ B (p65) (B) NF- $\kappa$ B (p50) and (C) I $\kappa$ B $\alpha$ . Rats were pretreated orally with Gelam honey (1 or 2 g/kg of body weight) for 1 or 7 days before inflammation, as induced by carrageenan injection. D.W.: distilled water, Carr: Carrageenan, IND: Indomethacin. Data are presented as the mean  $\pm$  S.E.M. (n=6). **a**: Significantly different ( $p < 0.05$ ) from the inflammation group (D.W.+Carr.). **b**: Significantly different ( $p < 0.05$ ) from the Indomethacin group (10 mg/kg IND+Carr.). **c**: Significantly different ( $p < 0.05$ ) between different honey doses at the same time point (1 day or 7 days). **d**: Significantly different ( $p < 0.05$ ) between the same honey dose at different time points (1 day and 7 days). doi:10.1371/journal.pone.0072365.g001

### Effect of Gelam Honey on Cytoplasmic Degradation of I $\kappa$ B $\alpha$

**Figure 3** showed that carrageenan injection induced the cytoplasmic degradation of I $\kappa$ B $\alpha$  protein showing low levels of I $\kappa$ B $\alpha$  when compared with the control groups (distilled water and two doses of Gelam honey) not induced with inflammation which exhibited high level of cytoplasmic I $\kappa$ B $\alpha$  protein. However, the cytoplasmic level of I $\kappa$ B $\alpha$  increased significantly by the pre-treatment with Gelam honey (1 and 2 g/kg of body weight) in both 1 and 7 days models. Interestingly, pre-treatment with 2 g/kg of body weight of Gelam honey inhibited the I $\kappa$ B $\alpha$  cytoplasmic degradation dose dependently showing more levels of cytosolic I $\kappa$ B $\alpha$  compared to the effect of lower dose of Gelam honey (1 g/kg of body weight) in both 1 and 7 days models (**Figure 3**).

### Histological Analyses of Rats Paw Tissues

To evaluate histologically the anti-inflammatory effect of Gelam honey, samples of the paw tissues from each experimental group were examined by H&E staining. The control groups which were fed with distilled water and Gelam honey at 1 or 2 g/kg of body weight (not induced with inflammation) showed normal paw tissue histology (**Figures 4A & 4B**). In contrast, the carrageenan injection into the rat right hind paw displayed massive accumulation of infiltrated inflammatory cells (**Figure 4C**), compared to

the control groups. However, the infiltration of inflammatory cells was significantly decreased with treatment of Gelam honey (1 or 2 g/kg of body weight) or Indomethacin (10 mg/kg of body weight), for both 1 and 7 days model (**Figures 4D–4F**). The degree of inflammation was evaluated by scores of inflammation from 0 to 5 (**Figure 4G**). The scores of inflammation also indicated that pre-treatment with Gelam honey (1 & 2 g/kg of body weight) for 7 days had greater effect in reducing the inflammatory cells in carrageenan-induced inflammation rats compared to 1 day.

### Immunohistochemistry Detection of COX-2 Protein Expression

To further elucidate the mechanism of action of Gelam honey, the protein expressions of some pro-inflammatory mediators such as COX-2 and TNF- $\alpha$  was determined using immunohistochemistry technique. As shown in **Figures 5A & 5B**, the normal control groups showed no expression of COX-2. However, the carrageenan-induced inflammation group showed significantly increased expression of COX-2 (80.6%) (**Figure 5C**), which was reduced significantly with pre-treatment of Gelam honey (1 or 2 g/kg of body weight) or Indomethacin (10 mg/kg of body weight), for 1 and 7 days (**Figures 5D–5F**). As expected, pre-treatment with 2 g/kg of body weight of Gelam honey for 7 days

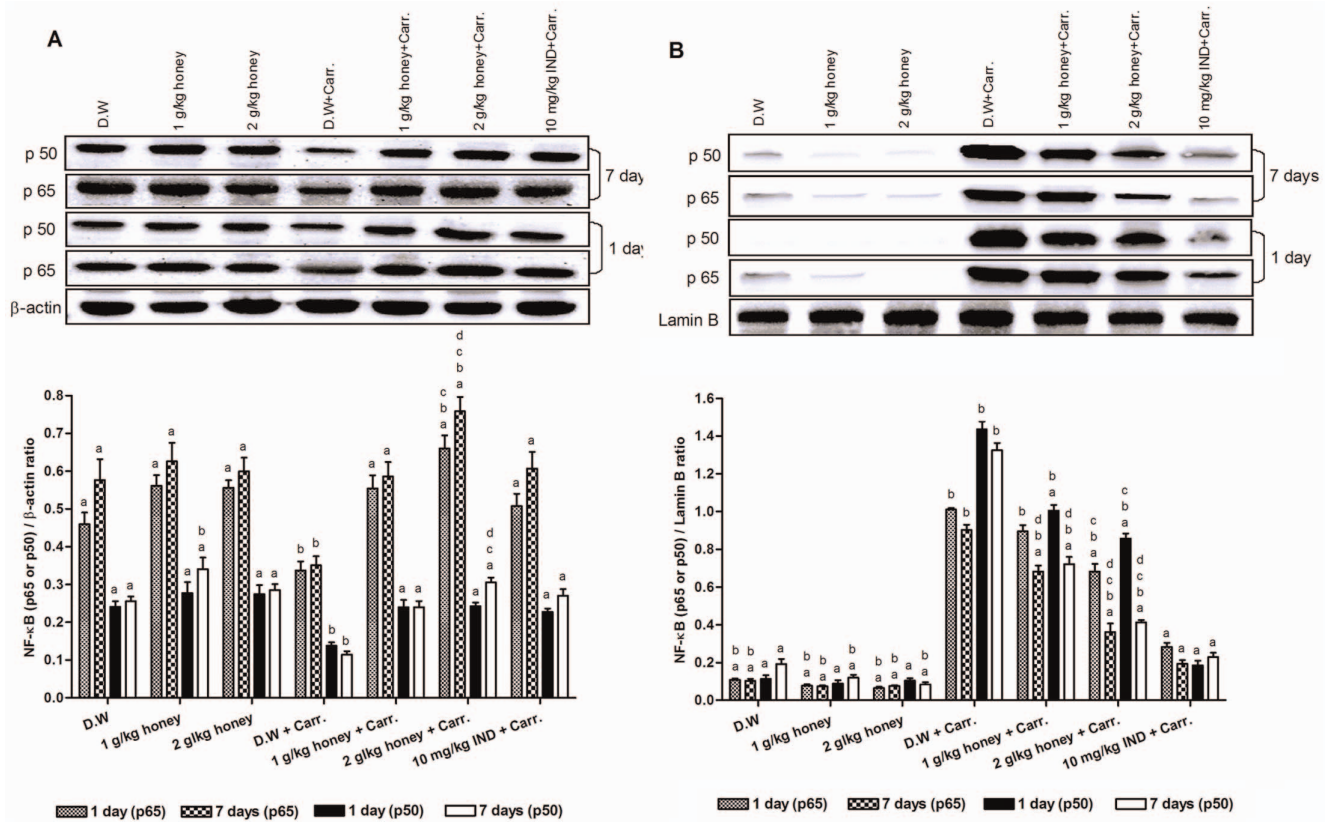

**Figure 2. The effect of Gelam honey on the protein expressions in rats paw tissues.** (A) Cytosolic NF- $\kappa$ B subunits p65 & p50 and (B) Nuclear NF- $\kappa$ B subunits p65 & p50. Rats were pretreated orally with Gelam honey (1 or 2 g/kg of body weight) for 1 or 7 days before inflammation, as induced by carrageenan injection. D.W.: distilled water, Carr: Carrageenan, IND: Indomethacin. Data are presented as the mean  $\pm$  S.E.M. (n=6). **a**: Significantly different ( $p < 0.05$ ) from the inflammation group (D.W.+Carr.). **b**: Significantly different ( $p < 0.05$ ) from the Indomethacin group (10 mg/kg IND+Carr.). **c**: Significantly different ( $p < 0.05$ ) between different honey doses at the same time point (1 day or 7 days) and same protein (p65 or p50). **d**: Significantly different ( $p < 0.05$ ) between the same honey dose at different time points (1 day and 7 days) and same protein (p65 or p50). doi:10.1371/journal.pone.0072365.g002

showed significantly higher reduction effect of COX-2 expression (26.29%) when compared with 1 day (44.14%) (Figure 5G).

### Immunohistochemistry Detection of TNF- $\alpha$ Protein Expression

The expression of TNF- $\alpha$  in the carrageenan-induced inflammation group was significantly increased compared to the control group (68.95%), but pre-treatment with Gelam honey for 1 and 7 days (1 or 2 g/kg of body weight) reduced its expression comparably with Indomethacin (10 mg/kg of body weight), as shown in Figures 6A–6F. Pre-treatment for 7 days with Gelam honey either 1 or 2 g/kg of body weight significantly reduced the TNF- $\alpha$  expression (29.53% and 22.80%, respectively), when compared with 1 day pre-treatment (53.75% and 30.11%, respectively) (Figure 6G).

### Discussion

Inflammation is part of host defence mechanism against infectious agents and injury and it is also involved in the pathophysiology of many diseases when left unresolved. Acute inflammation is a short-term process which is characterized by typical signs of inflammation, such as swelling, heat, redness, pain and loss of function due to the infiltration of the tissues by plasma and leukocytes [43,44]. Several pro-inflammatory mediators were released during the inflammatory response including iNOS,

COX-2, TNF- $\alpha$  and IL-6 and the induction of these pro-inflammatory mediators are largely regulated by transcriptional activation [45].

NF- $\kappa$ B is known to be a major transcription factor that regulates the genes expression of pro-inflammatory mediators which participate in the inflammatory response [46,47]. NF- $\kappa$ B proteins, p65 and p50, exist normally in the cytoplasm as an inactive complex by binding to inhibitory factor, I $\kappa$ B $\alpha$ , thereby blocking NF- $\kappa$ B nuclear translocation. Upon stimulation with inflammatory stimuli, I $\kappa$ B $\alpha$  is phosphorylated by I $\kappa$ B kinase (IKK) and separated from the NF- $\kappa$ B subunits which lead to its degradation. The free NF- $\kappa$ B is translocated into the nucleus and acts as transcription factor. In the nucleus, NF- $\kappa$ B dimers combine with target DNA elements to activate transcription of genes encoding for proteins involved in inflammation [48,49]. In inflammation, activated NF- $\kappa$ B regulates transcription of IL-1 $\beta$ , IL-6, iNOS, COX-2 and TNF- $\alpha$  [50]. In order to reduce inflammation, the major focus has been on inhibiting NF- $\kappa$ B activation and its translocation into the nucleus thereby decreasing the production of pro-inflammatory mediators. Several natural products such as green tea, curcumin, ginger and propolis have been shown to ameliorate inflammatory response by inhibition of the pro-inflammatory mediators such as iNOS, COX-2 and TNF- $\alpha$  as well as inactivation of the NF- $\kappa$ B [51–53]. Our previous study on the anti-inflammatory properties of Gelam honey showed that it reduces edema in a dose dependent fashion in inflamed rat paw with concomitant reduced production

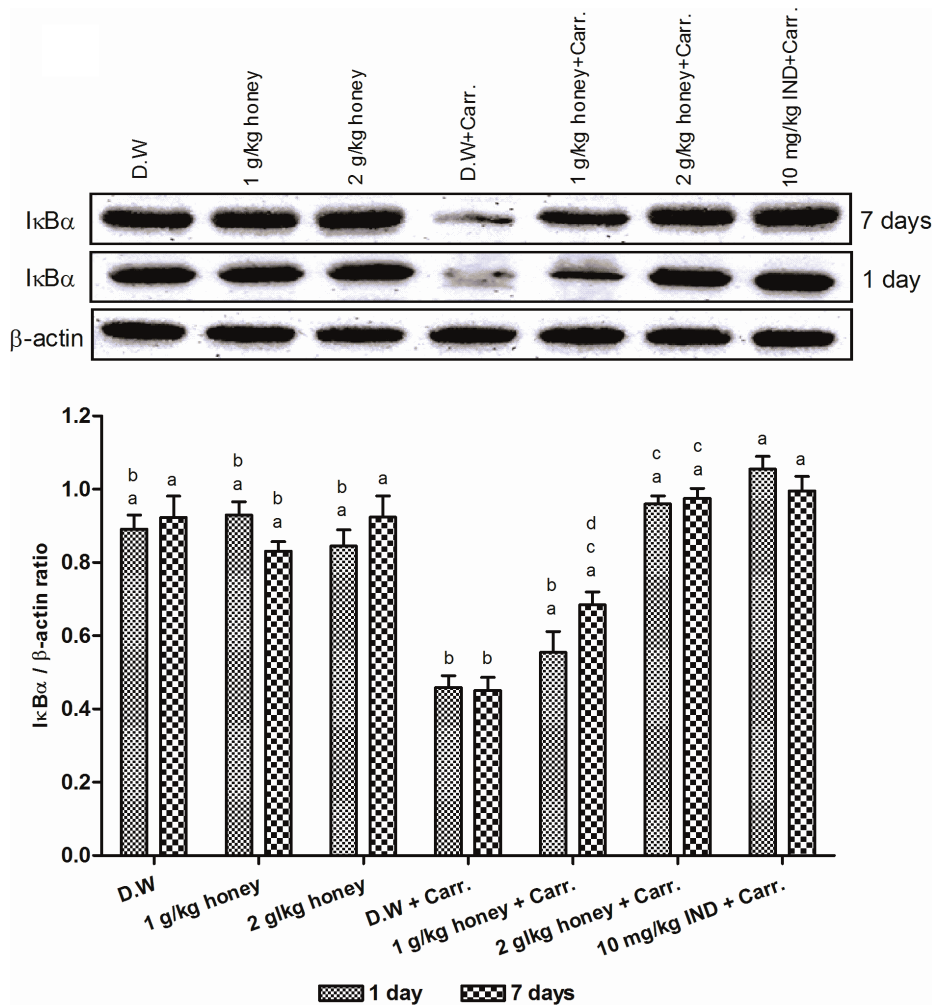

**Figure 3. The effect of Gelam honey on the cytosolic I $\kappa$ B $\alpha$  protein expression in rats paw tissues.** Rats were pretreated orally with Gelam honey (1 or 2 g/kg of body weight) for 1 or 7 days before inflammation, as induced by carrageenan injection. D.W.: distilled water, Carr: Carrageenan, IND: Indomethacin. Data are presented as the mean  $\pm$  S.E.M. (n = 6). **a:** Significantly different ( $p < 0.05$ ) from the inflammation group (D.W.+Carr.). **b:** Significantly different ( $p < 0.05$ ) from the Indomethacin group (10 mg/kg IND+Carr.). **c:** Significantly different ( $p < 0.05$ ) between different honey doses at the same time point (1 day or 7 days). **d:** Significantly different ( $p < 0.05$ ) between the same honey dose at different time points (1 day and 7 days). doi:10.1371/journal.pone.0072365.g003

of pro-inflammatory mediators (both genes and proteins) such as iNOS, COX-2, IL-6 and TNF- $\alpha$  in plasma and tissues [33]. In addition, we have also reported that Gelam honey contains many phenolic compounds such as ellagic acid, gallic acid, caffeic acid, quercetin and chrysin, which correlated to its antioxidant and anti-inflammatory activities [16,33].

In this study we evaluated the mechanism by which Gelam honey exerts its anti-inflammatory effect in association with NF- $\kappa$ B signaling pathway by evaluating the genes and proteins that are involved in the pathway. The findings of this study confirmed the nuclear translocation of NF- $\kappa$ B subunits (p65 and p50) and cytoplasmic degradation of I $\kappa$ B $\alpha$  during inflammation as induced in rats by carrageenan injection. However, pre-treatment with Gelam honey significantly inhibited the nuclear translocation of NF- $\kappa$ B subunits (p65 and p50) as supported by increased levels of p65 and p50 protein in the cytosol and decreased cytosolic I $\kappa$ B $\alpha$  degradation. Various *in vitro* and *in vivo* experimental models have reported the inhibitory effects of several natural products and polyphenols on the production of pro-inflammatory mediators through attenuating the activation of NF- $\kappa$ B pathway. Oh et al. [27]

reported that *Euonymus alatus* extract, a known medical herb in Korea, significantly attenuated the LPS-induced I $\kappa$ B $\alpha$  phosphorylation/degradation, NF- $\kappa$ B translocation from cytoplasm to the nucleus and subsequent NO synthesis in RAW 264.7 cells. Garcia-Mediavilla et al. [54] reported that quercetin significantly inhibited protein and mRNA levels of iNOS and COX-2 in the human hepatocyte-derived Chang liver cells. In animal study, Ukil et al. [55] found that curcumin reduced the levels of NO and iNOS expression associated with suppression of NF- $\kappa$ B activation in trinitrobenzene sulphonic acid (TNBS)-induced colitis in mouse. Zhang et al. [56] demonstrated that purple sweet potato inhibits the up-regulation of the expression of p65 NF- $\kappa$ B associated with the reduction of COX-2 and iNOS expressions in D-galactose-induced liver injury in mouse. Moreover, Hsu et al. [53] found that the combination of soy and tea inhibited nuclear NF- $\kappa$ B p50 protein level via induction of I $\kappa$ B $\alpha$  that led to decreased TNF- $\alpha$  and IL-6 proteins expression in hormone-induced prostate cancer in rats. Therefore, our results strongly suggest that a possible mechanism of Gelam honey-mediated anti-inflammatory activity could be regulated by the action of phenolic compounds such as gallic acid, caffeic



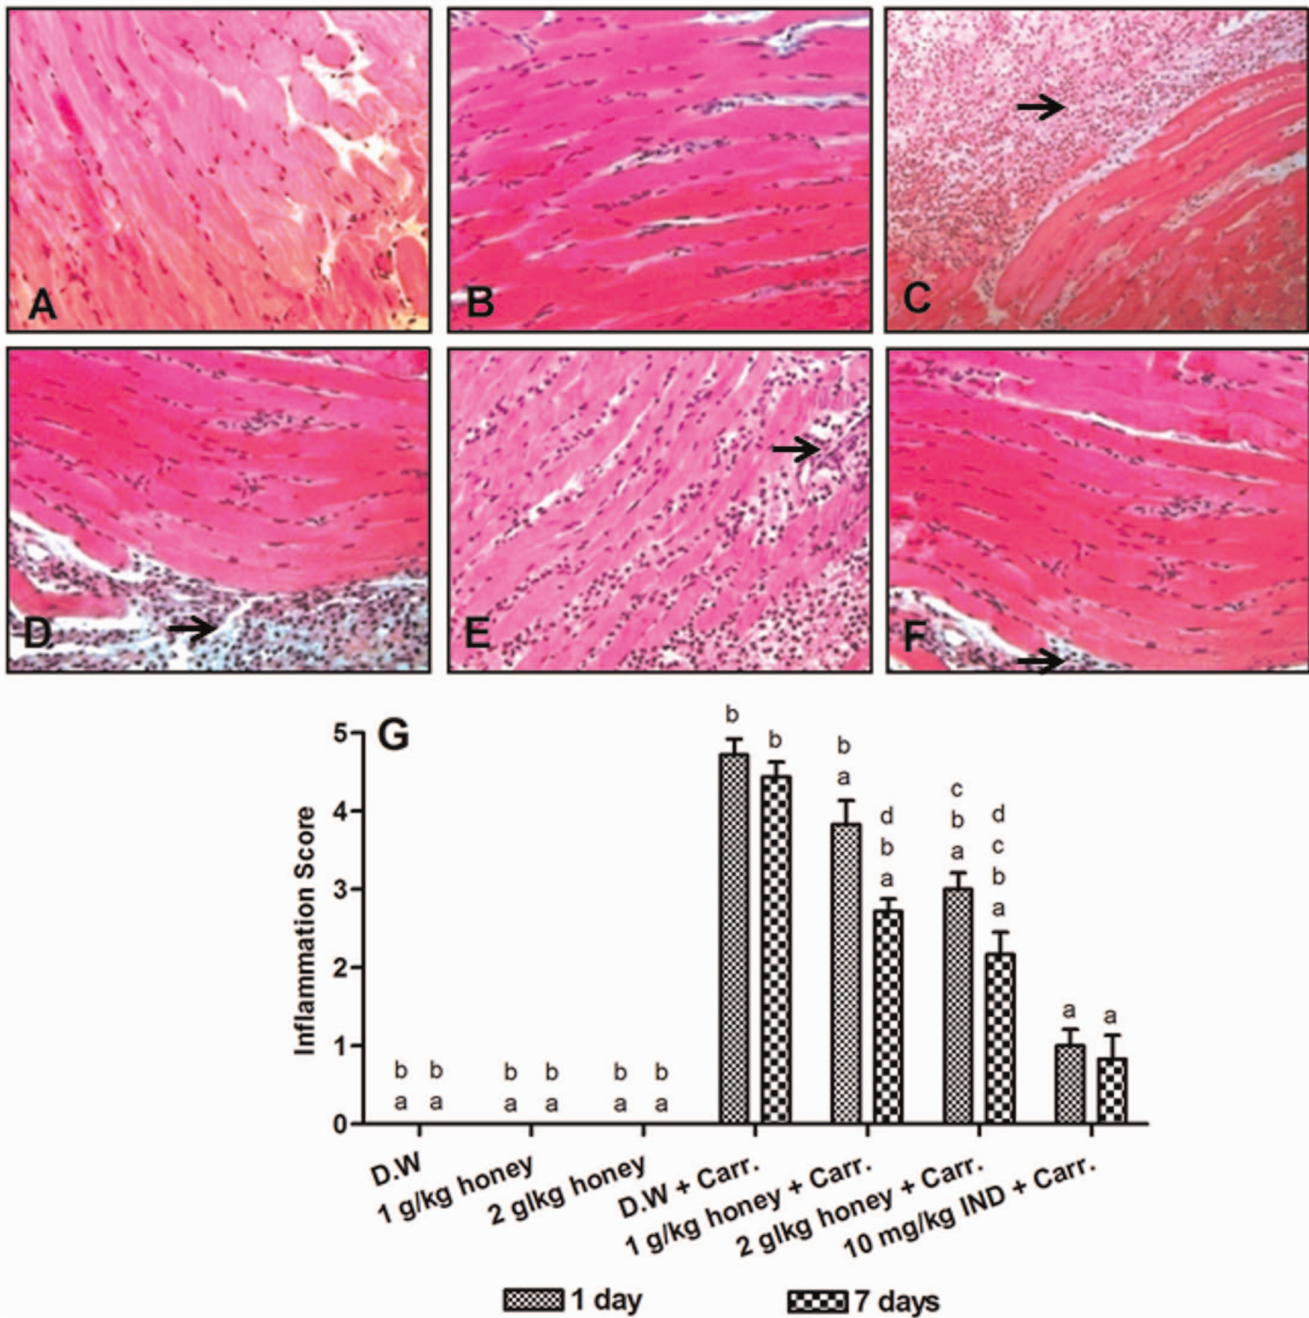

**Figure 4. Histological evaluation of anti-inflammatory effects of Gelam honey.** Hematoxylin and Eosin staining of paw tissues of rats pre-treated with: (A) D.W., (B) 2 g/kg Gelam honey, (C) D.W.+Carr., (D) 2 g/kg Gelam honey for 1 day+Carr. (E) 2 g/kg Gelam honey for 7 days+Carr. and (F) 10 mg/kg IND.+Carr., in the model of carrageenan-induced edema. Each photo is representative of six specimens for each group. All figures were magnified by 200X. (G) Scores of inflammation in rats paw tissues by Hematoxylin and Eosin staining. Data are expressed as mean ± S.E.M. (n = 6). D.W: Distilled water, Carr.: Carrageenan and IND: Indomethacin. **a:** Significantly different ( $p < 0.05$ ) from the inflammation group (D.W.+Carr.). **b:** Significantly different ( $p < 0.05$ ) from the Indomethacin group (10 mg/kg IND+Carr.). **c:** Significantly different ( $p < 0.05$ ) between different honey doses at the same time point (1 day or 7 days). **d:** Significantly different ( $p < 0.05$ ) between the same honey dose at different time points (1 day and 7 days). The arrows indicated inflammatory cells. doi:10.1371/journal.pone.0072365.g004

acid, hesperetin and quercetin which were found as the active principle of Gelam honey [16]. Polyphenols in honey have been shown to be bioavailable by Schramm et al [57] who reported that consumption of 1.5 g of two types of honey/kg body weight among 40 subjects increased plasma level of total phenolic content similar to antioxidant and reducing capacity of plasma [57]. In another study

by Alvarez-Suarez et al, both Cuban honey extract and the flavonoid quercetin were shown to protect erythrocytes membrane against oxidative damage. Quercetin was found to be incorporated into the cell membrane. [58]. Phenolic aglycons have been proposed to be the major form of flavonoid in honey and it is more readily absorbed through the gut barrier than their corresponding

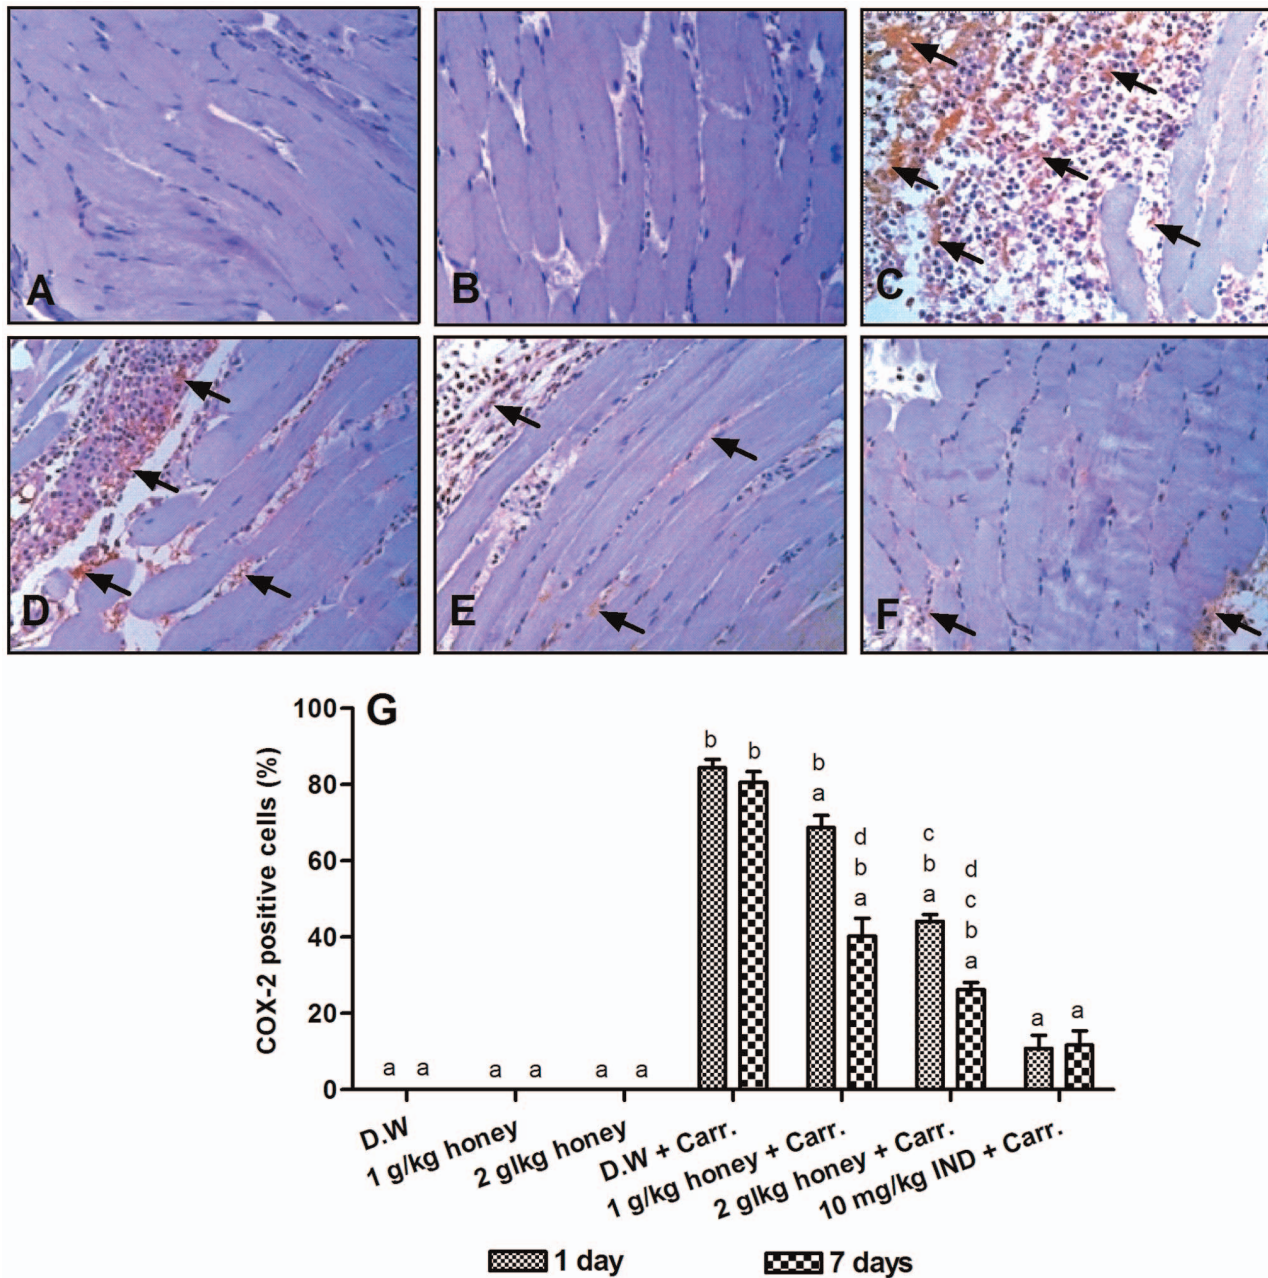

**Figure 5. Immunohistochemical staining for COX-2 expression in the paw tissues.** Rats were pre-treated with: (A) D.W., (B) 2 g/kg Gelam honey, (C) D.W.+Carr., (D) 2 g/kg Gelam honey for 1 day+Carr., (E) 2 g/kg Gelam honey for 7 days+Carr. and (F) 10 mg/kg IND.+Carr. All figures were magnified by 200X. The arrows indicated positive staining of COX-2 (400X). (G) Comparison of the percentage of cells stained with COX-2 in rats paw tissues. Data are expressed as mean  $\pm$  S.E.M. (n=6). D.W: Distilled water, Carr.: Carrageenan and IND: Indomethacin. **a:** Significantly different ( $p<0.05$ ) from the inflammation group (D.W.+Carr.). **b:** Significantly different ( $p<0.05$ ) from the Indomethacin group (10 mg/kg IND+Carr.). **c:** Significantly different ( $p<0.05$ ) between different honey doses at the same time point (1 day or 7 days). **d:** Significantly different ( $p<0.05$ ) between the same honey dose at different time points (1 day and 7 days). doi:10.1371/journal.pone.0072365.g005

glycosides by passive diffusion, thus making flavonoids in honey to be more readily bioavailable. [59]. In a separate study by Batumalei et al [60] it was shown that pretreatment of hamster pancreatic cells in culture (HIT-T15 cells) with Gelam honey extract (*Melaleuca* spp.) or the flavonoid components (chrysin, luteolin, and quercetin), prior to stimulation by 20 or 50 mM glucose showed a significant decrease in the production of ROS, glucose-induced lipid peroxidation, and a significant increase in insulin content and the viability of cells cultured under hyperglycemic condition showing the

bioavailability of flavonoid in honey offering protection to pancreatic beta cells from oxidative damage.

Histological study indicated that carrageenan-induced inflammation is linked to intense edema characterized by increased migration of infiltrates inflammatory polymorphonuclear leukocytes (PMNs) cells, mainly neutrophils, in the inflamed paw tissues. Our results are consistent with other carrageenan-induced inflammation animal model showing increased neutrophils migration to the site of injury [40,61–63]. Interestingly, Gelam



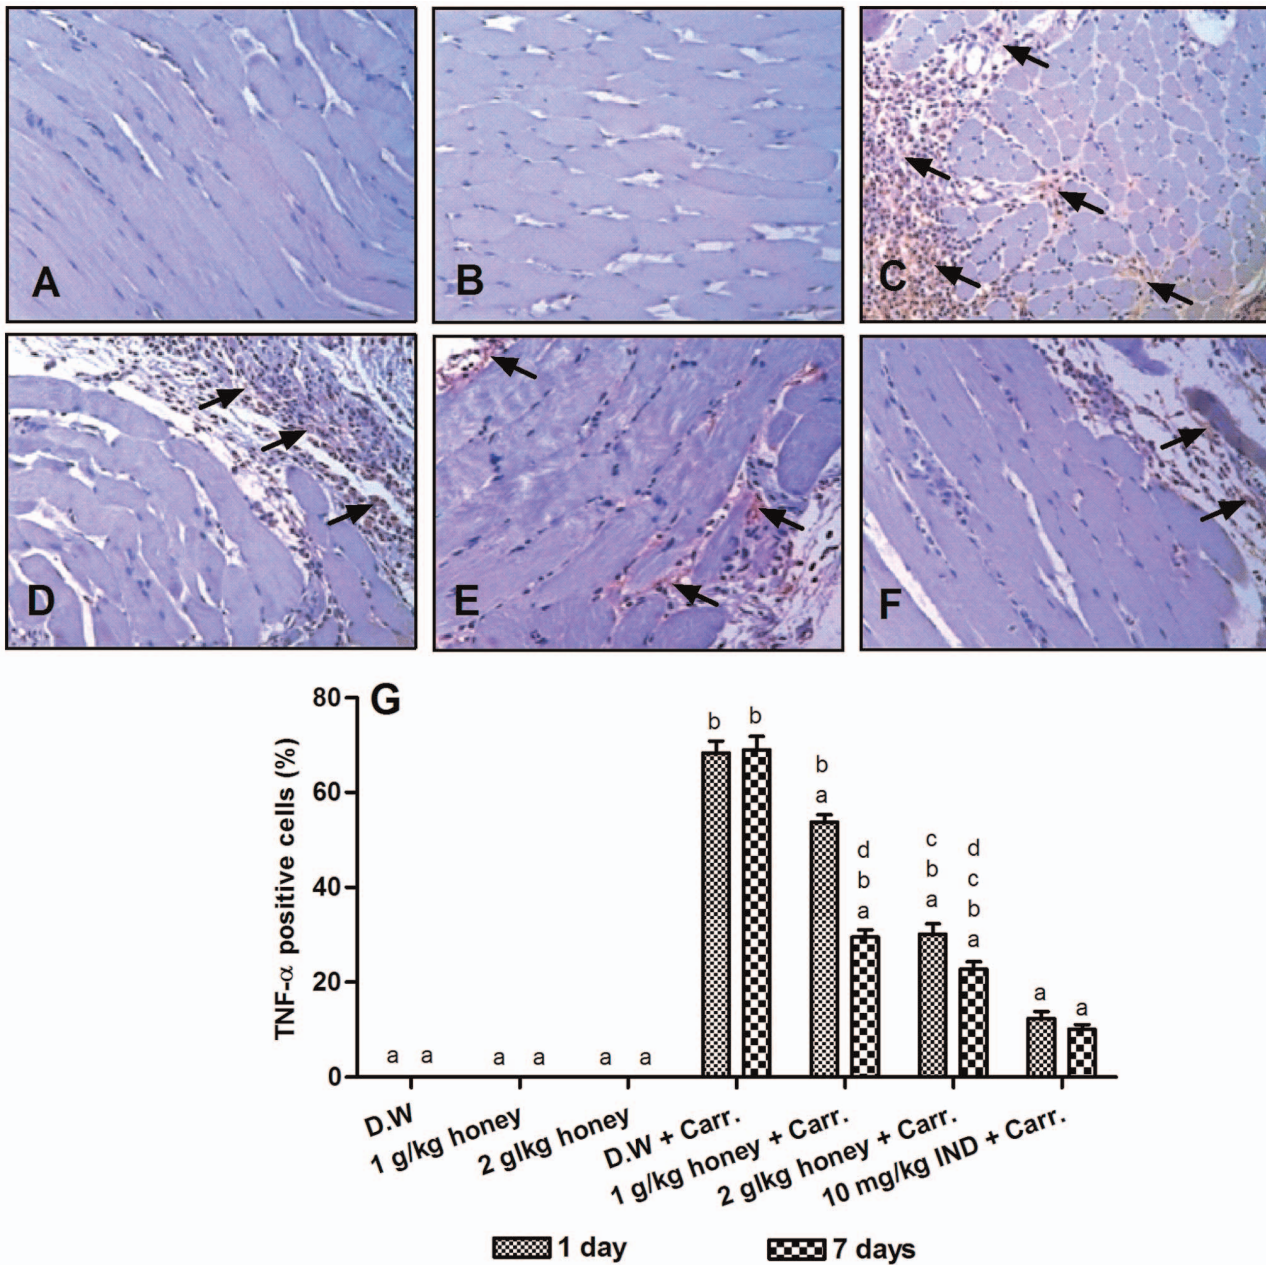

**Figure 6. Immunohistochemical staining for TNF- $\alpha$  expression in the paw tissues.** Rats pre-treated with: (A) D.W., (B) 2 g/kg Gelam honey, (C) D.W.+Carr., (D) 2 g/kg Gelam honey for 1 day+Carr. (E) 2 g/kg Gelam honey for 7 days+Carr. and (F) 10 mg/kg IND+Carr. All figures were magnified by 200X. The arrows indicated positive staining of TNF- $\alpha$  (400X). (G) Comparison of the percentage of cells stained with TNF- $\alpha$  in rats paw tissues. Data are expressed as mean  $\pm$  S.E.M. (n=6). D.W: Distilled water, Carr.: Carrageenan and IND: Indomethacin. **a**: Significantly different ( $p < 0.05$ ) from the inflammation group (D.W.+Carr.). **b**: Significantly different ( $p < 0.05$ ) from the Indomethacin group (10 mg/kg IND+Carr.). **c**: Significantly different ( $p < 0.05$ ) between different honey doses at the same time point (1 day or 7 days). **d**: Significantly different ( $p < 0.05$ ) between the same honey dose at different time points (1 day and 7 days). doi:10.1371/journal.pone.0072365.g006

honey treatment drastically and dose-dependently diminished the inflammatory cell migration, most likely neutrophils, in carrageenan-induced rat paw edema. We also observed that the effect was similar to Indomethacin, a well known NSAID anti-inflammatory drug. Bang et al. [41] reported that piperine, a phenolic compound in black pepper extract, significantly reduced the inflammatory cells infiltration in ankle joints of carrageenan-induced arthritis rats. Lucetti et al. [40] also found that lupeol acetate, which was isolated from *Himatanthus drasticus* Plumel (medicinal plant in Northeast Brazil), led to significant decrease in

inflammatory cells infiltration of carrageenan-induced paw edema in mouse. Sindhu et al. [64] showed that treatment with *Trigonella foenum graecum*, an herbaceous plant of the leguminous family, significantly decreased the neutrophil infiltration in inflamed paws of adjuvant induced arthritis in rats. Thus, in line with other studies, the present histological results revealed that severe edema formation and elevated level of cellular infiltration in rats paw tissues decreased when treated with Gelam honey, in a dose dependent manner.

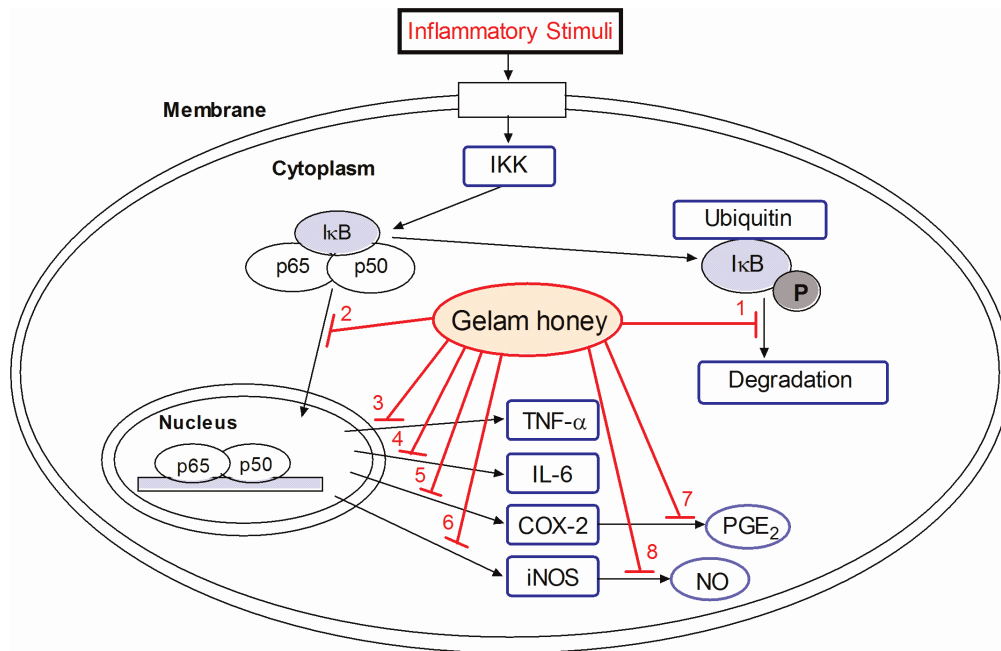

**Figure 7. Proposed mechanism of action by which Gelam honey inhibited inflammation in carrageenan-induced rats paw edema.** Activation of NF- $\kappa$ B pathway by different inflammatory stimuli leads to phosphorylation of inhibitor of kappa B ( $I\kappa B\alpha$ ) by  $I\kappa B$  kinase (IKK) which separates the NF- $\kappa$ B dimers (p50 and p65) and leads to the degradation of  $I\kappa B\alpha$ . The free NF- $\kappa$ B translocates from the cytoplasm into the nucleus and acts as transcription factor. In the nucleus, NF- $\kappa$ B dimers combine with target DNA elements to activate transcription of genes encoding for proteins involved in inflammation such as cyclooxygenase (COX-2), inducible nitric oxide synthase (iNOS), tumor necrosis factor- $\alpha$  (TNF- $\alpha$ ) and interleukin-6 (IL-6). The study indicated that Gelam honey inhibited (1) the degradation of  $I\kappa B\alpha$  and leading to (2) nuclear translocation of NF- $\kappa$ B dimer (p50 and p65) resulting in the decreased expressions of (3) TNF- $\alpha$ , (4) IL-6, (5) COX-2 and (6) iNOS, as well as reduced production of (7) prostaglandin E<sub>2</sub> (PGE<sub>2</sub>) and (8) nitric oxide (NO).

doi:10.1371/journal.pone.0072365.g007

In order to validate the protein expression, histological expression of two proteins, namely COX-2 and TNF- $\alpha$  were determined. The reason of choosing these two proteins is that COX-2 is an important key enzyme in inflammation and it is also the rate-limiting enzyme that catalyzes the formation of prostaglandins. TNF- $\alpha$  is a pro-inflammatory cytokine which plays several important roles in inflammation based on its appearance at the inflammatory site and ability to induce certain mechanisms including activation and chemotaxis of leukocytes, expression of adhesion molecules on neutrophils and endothelial cells, and regulation of the secretion of other pro-inflammatory cytokines [65–67]. Our immunohistochemistry results showed that the expressions of COX-2 and TNF- $\alpha$  were significantly increased in rats paw tissues after carrageenan-induced inflammation when compared with control rats (without inflammation) which is in agreement with other studies showing increased expressions of COX-2 and TNF- $\alpha$  in the paw tissues of mouse and rats submitted to carrageenan-induced inflammation [40,63,68]. We showed that pre-treatment with Gelam honey significantly reduced the expressions of COX-2 and TNF- $\alpha$  dose-dependently in rats paw tissues showing similar reduction effect with Indomethacin. Cui et al. [69] found that resveratrol reduced iNOS, COX-2 and TNF- $\alpha$  expressions in dextran sulphate sodium (DSS)-induced colitis in mouse. In addition, ginger extract (*Zingiber officinale*) significantly reduced the elevated expression of NF- $\kappa$ B and TNF- $\alpha$  in ethionine-induced hepatoma rats [42].

Our proposed mechanism by which Gelam honey inhibits inflammation in carrageenan-induced paw edema in rats is depicted in **Figure 7**. Gelam honey may inhibit inflammation through suppression of NF- $\kappa$ B pathway by blocking the incoming

signal pathway which activates the IKK complex, thus interfering in the phosphorylation, ubiquitination and degradation of  $I\kappa B$  proteins. This will then prevent the translocation of NF- $\kappa$ B dimers (p65 and p50) into the nucleus finally resulting in the reduction of iNOS, COX-2, TNF- $\alpha$  and IL-6 expressions as well as PGE<sub>2</sub> and NO production, as shown in our previous study [33].

## Conclusion

In conclusion, our results strongly suggest that Gelam honey inhibited inflammation via inactivation of NF- $\kappa$ B, blocking  $I\kappa B\alpha$  degradation and nuclear translocation of p65 and p50 NF- $\kappa$ B subunits thereby inhibiting the binding of NF- $\kappa$ B to its target DNA resulting in inhibition of transcription of genes for pro-inflammatory mediators such as COX-2, TNF- $\alpha$ , IL-6 and iNOS. Interestingly, the results of this study indicated that NF- $\kappa$ B is a pivotal transcription factor for inflammatory signal pathway.

## Acknowledgments

The authors would like to express sincere gratitude to the staff of the Department of Biochemistry, Faculty of Medicine, Universiti Kebangsaan Malaysia (UKM) for technical support and to Dr Taty Anna Kamarudin for her expertise in identifying inflammatory cells in muscle tissue.

## Author Contributions

Conceived and designed the experiments: SZH YAMY. Performed the experiments: SZH. Analyzed the data: SZH KMY SM. Contributed reagents/materials/analysis tools: YAMY KMY SM. Wrote the paper: SZH YAMY.

## References

- Alvarez-Suarez JM, Tulipani S, Diaz D, Estevez Y, Romandini S, et al. (2010) Antioxidant and antimicrobial capacity of several monofloral Cuban honeys and their correlation with color, polyphenol content and other chemical compounds. *Food Chem Toxicol* 48: 2490–2499.
- Blasa M, Candracci M, Accorsi A, Piacentini MP, Albertini MC, et al. (2006) Raw *Millefiori* honey is packed full of antioxidants. *Food Chem* 97: 217–222.
- Leal WS (2013) Healing power of honey. *PNAS* 110: 8763–8764.
- Mobarok AM, Al-Swayeh OA (2003) Honey potentiates the gastric protection effects of sucralfate against ammonia-induced gastric lesions in rats. *Saudi J Gastroenterol* 9: 117–123.
- Al-Waili NS, Salom K, Al-Ghamdi AA (2011) Honey for wound healing, ulcers, and burns; data supporting its use in clinical practice. *Sci World J* 11: 766–787.
- Orhan F, Sekerek BE, Kocabas CN, Sackesen C, Adalioglu G, et al. (2003) Complementary and alternative medicine in children with asthma. *Ann Allergy Asthma Immun* 90: 611–615.
- Molan PC (2001) Why honey is effective as a medicine?. The scientific explanation of its effects. *Bee World* 82: 22–40.
- Patricia V (2002) Effect of stingless bee honey in selenite induced cataracts. *Apiacta* 3:1–2.
- Swellam T, Miyayana N, Onozawa M, Hattori K, Kawai K, et al. (2003) Antineoplastic activity of honey in an experimental bladder cancer implantation model: *in vivo* and *in vitro* studies. *Int J Urol* 10: 213–219.
- Estevinho L, Pereira AP, Moreira L, Dias LG (2008) Antioxidant and antimicrobial effects of phenolic compounds extracts of Northeast Portugal honey. *Food Chem* 46: 3774–3779.
- Irish J, Carter DA, Blair SE, Heard TA (2008) Antibacterial activity of honey from Australian stingless bee *Trigona carbonaria*. *Int J Antimicrob Ag* 32: 89–90.
- Tan HT, Rahman RA, Gan SH, Halim AS, Hassan SA, et al. (2009) The antibacterial properties of Malaysian tualang honey against wound and enteric microorganisms in comparison to manuka honey. *BMC Complem Altern Med* 9: 34.
- Fauzi AN, Norazmi MN, Yaacob NS (2011) Tualang honey induces apoptosis and disrupts the mitochondrial membrane potential of human breast and cervical cancer cell lines. *Food Chem Toxicol* 49: 871–878.
- Owayele BV, Adenekan OT, Soladoye AO (2011) Effects of honey on inflammation and nitric oxide production in wistar rats. *J Chinese Integr Med* 9: 447–452.
- Yao LH, Jiang YM, Shi J, Tomas-Barberan FA, Datta N, et al. (2004) Flavonoids in food and their health benefits. *Plant Food Hum Nutr* 59: 113–122.
- Hussein SZ, Yusoff KM, Makpol S, Yusof YM (2011) Antioxidant capacities and total phenolic contents increase with gamma irradiation in two types of Malaysian honey. *Molecules* 16: 6378–6395.
- Ferrero-Miliani L, Nielsen OH, Andersen PS, Girardin SE (2007) Chronic inflammation: importance of NOD2 and NALP3 in interleukin-1 beta generation. *Clin Exp Immunol* 147: 227–235.
- Lawrence T, Fong C (2010) The resolution of inflammation: Anti-inflammatory roles for NF- $\kappa$ B. *Int J Biochem Cell Biol* 42: 519–523.
- Iwalewa EO, McGaw LJ, Naidoo V, Eloff JN (2007) Inflammation: the foundation of diseases and disorders. A review of phytochemicals of South African origin used to treat pain and inflammatory conditions. *Afr J Biotechnol* 6: 2868–2885.
- Mueller M, Hobiger S, Jungbauer A (2010) Anti-inflammatory activity of extracts from fruits, herbs and spices. *Food Chem* 122: 987–996.
- Hung TM, Dang NH, Kim JC, Choi JS, Lee HK, et al. (2009) Phenolic glycosides from *Alangium salviifolium* leaves with inhibitory activity on LPS-induced NO, PGE<sub>2</sub> and TNF- $\alpha$  production. *Bioorg Med Chem Lett* 19: 4389–4393.
- Calixto JB, Campos MM, Otuki MF, Santos ARS (2004) Anti-inflammatory compounds of plant origin. Part II Modulation of pro-inflammatory cytokines, chemokines and adhesion molecules. *Planta Med* 70: 93–103.
- Reyes-Gordillo K, Segovia J, Shibayama M, Vergara P, Moreno MG, et al. (2007) Curcumin protects against acute liver damage in the rat by inhibiting NF- $\kappa$ B, proinflammatory cytokines and oxidative stress. *Biochim Biophys Acta* 1770: 989–996.
- Himaya SWA, Ryu B, Qian ZJ, Li Y, Kim SK (2011) 1-(5-bromo-2-hydroxy-4-methoxyphenyl)ethanone [SE1] suppresses pro-inflammatory responses by blocking NF- $\kappa$ B and MAPK signaling pathways in activated microglia. *Eur J Pharmacol* 670: 608–616.
- Chen F, Castranova V, Shi X, Demers LM (1999) New insights into the role of nuclear factor-kappaB, a ubiquitous transcription factor in the initiation of diseases. *Clin Chem* 45: 7–17.
- Tak P, Firestein G (2001) NF- $\kappa$ B: a key role in inflammatory disease. *J Clin Invest* 107: 7–11.
- Oh BK, Mun J, Seo HW, Ryu SY, Kim YS (2011) *Euonymus alatus* extract attenuates LPS-induced NF- $\kappa$ B activation via IKK $\beta$  inhibition in RAW 264.7 cells. *J Ethnopharmacol* 134: 288–293.
- Baldwin AS (2001) The transcription factor NF- $\kappa$ B and human disease. *J Clin Invest* 107: 3–6.
- Zhou YH, Yu JP, Liu YF, Teng XJ, Ming M, et al. (2006) Effects of ginkgo biloba extract on inflammatory mediators (SOD, MDA, TNF- $\alpha$ , NF- $\kappa$ Bp65, IL-6) in TNBS-induced Colitis in rats. *Mediat Inflamm* 2006: 92642.
- Kang OH, Jang HJ, Chae HS, Oh YC, Choi JG, et al. (2009) Anti-inflammatory mechanisms of resveratrol in activated HMC-1 cells: Pivotal roles of NF- $\kappa$ B and MAPK. *Pharmacol Res* 59: 330–337.
- Gonzales AM, Orlando RA (2008) Curcumin and resveratrol inhibit nuclear factor-kappaB-mediated cytokine expression in adipocytes. *Nutr Metab* 5: 17.
- Yang F, Oz HS, Barve S, de Villiers WJ, McClain CJ, et al. (2001) The green tea polyphenol (-)-epigallocatechin-3-gallate blocks nuclear factor-kappa B activation by inhibiting I kappa B kinase activity in the intestinal epithelial cell line IEC-6. *Mol Pharmacol* 60: 528–533.
- Hussein SZ, Yusoff KM, Makpol S, Yusof YM (2012) Gelam honey inhibits the production of proinflammatory mediators NO, PGE<sub>2</sub>, TNF- $\alpha$ , and IL-6 in carrageenan-induced acute paw edema in rats. *Evid Based Compl Alt Med* 2012: 109636.
- Molan PC, Allen KL (1996) The effect of gamma irradiation on the antibacterial activity of honey. *J Pharm Pharmacol* 48: 1206–1209.
- Winter CA, Risley EA, Nuss GW (1962) Carrageenan-induced oedema in hind paw of the rats as an assay for anti-inflammatory drugs. *Proc Soc Exp Biol Med* 111: 544–547.
- Igbe I, Ching FP, Eromon A (2010) Anti-inflammatory activity of aqueous fruit pulp extract of *Hunteria umbellata* K. Schum in acute and chronic inflammation. *Acta Pol Pharm Drug Res* 67: 81–85.
- Kassim M, Achouri M, Mansor M, Yusoff KM (2010) The inhibitory effects of Gelam honey and its extracts on nitric oxide and prostaglandin E<sub>2</sub> in inflammatory tissues. *Fitoterapia* 81: 1196–1201.
- Muthusamy VR, Kannan S, Sadhaasivam K, Gounder SS, Davidson CJ, et al. (2012) Acute exercise stress activates Nrf2/ARE signaling and promotes antioxidant mechanisms in the myocardium. *Free Radical Bio Med* 52: 366–376.
- Bradford MM (1976) A rapid and sensitive method for the quantitation of microgram quantities of protein utilizing the principle of protein dye binding. *Anal Biochem* 72: 248–254.
- Lucetti DL, Lucetti EC, Bandeira MA, Veras HN, Silva AH, et al. (2010) Anti-inflammatory effects and possible mechanism of action of luteol acetate isolated from *Himatanthus drasticus* (Mart.) Plumel. *J Inflamm* 7: 60.
- Bang JS, Oh DH, Choi HM, Sur BJ, Lim SJ, et al. (2009) Anti-inflammatory and antiarthritic effects of piperine in human interleukin 1 $\beta$ -stimulated fibroblast-like synoviocytes and in rat arthritis models. *Arthritis Res Ther* 11: R49.
- Habib SHM, Makpol S, Abdul Hamid NA, Das S, Wan Ngah WZ, et al. (2008) Ginger extract (*Zingiber officinale*) has anti-cancer and anti-inflammatory effects on ethionine-induced hepatoma rats. *Clinics* 63: 807–813.
- Libby P (2007) Inflammatory mechanisms: the molecular basis of inflammation and disease. *Nutr Rev* 65: S140–146.
- Gyurkovska V, Alipieva K, Maciuk A, Dimitrova P, Ivanovska N, et al. (2011) Anti-inflammatory activity of Devil's claw *in vitro* systems and their active constituents. *Food Chem* 125: 171–178.
- Park YM, Won JH, Yun KJ, Ryu JH, Han YN, et al. (2006) Preventive effect of *Ginkgo biloba* extract (GBB) on the lipopolysaccharide-induced expressions of inducible nitric oxide synthase and cyclooxygenase-2 via suppression of nuclear factor-kappaB in RAW 264.7 cells. *Biol Pharm Bull* 29: 985–990.
- Muller JM, Ziegler-Heitbrock HW, Baeuerle PA (1993) Nuclear factor kappa B, a mediator of lipopolysaccharide effects. *Immunobiology* 187: 233–256.
- Karin M, Ben-Neriah Y (2000) Phosphorylation meets ubiquitination: the control of NF- $\kappa$ B activity. *Annu Rev Immunol* 18: 621–663.
- Lee CW, Kim SC, Kwak TW, Lee JR, Jo MJ, et al. (2012) Anti-inflammatory effects of Bangpungtongsung-San, a traditional herbal prescription. *Evid Based Compl Alt Med* 2012: 892943.
- Park K, Kang SR, Park HS, Do Hoon Lee DH, Nagappan A, et al. (2012) Regulation of proinflammatory mediators via NF- $\kappa$ B and p38 MAPK-dependent mechanisms in RAW264.7 macrophages by polyphenol components isolated from Korea *Lonicera japonica* THUNB. *Evid Based Compl Alt Med* 2012: 828521.
- Ghosh S, May MJ, Kopp EB (1998) NF- $\kappa$ B and rel proteins: evolutionarily conserved mediators of immune responses. *Annu Rev Immunol* 16: 225–260.
- Jian YT, Mai GF, Wang JD, Zhang YL, Luo RC, et al. (2005) Preventive and therapeutic effects of NF-kappaB inhibitor curcumin in rats colitis induced by trinitrobenzene sulfonic acid. *World J Gastroenterol* 11: 1747–1752.
- Paulino N, Lemos Abreu SR, Uto Y, Koyama D, Nagasawa H, et al. (2008) Anti-inflammatory effects of a bioavailable compound, Artepillin C, in Brazilian propolis. *Eur J Pharmacol* 587: 296–301.
- Hsu A, Bruno RS, Lohr CV, Alan W, Taylor A, et al. (2011) Dietary soy and tea mitigate chronic inflammation and prostate cancer via NF- $\kappa$ B pathway in the Noble rat model. *J Nutr Biochem* 22: 502–510.
- Garcia-Mediavilla V, Crespo I, Collado PS, Esteller A, Sanchez-Campos S, et al. (2007) The anti-inflammatory flavones quercetin and kaempferol cause inhibition of inducible nitric oxide synthase, cyclooxygenase-2 and reactive C-protein and down-regulation of the nuclear factor kappaB pathway in Chang Liver cells. *Eur J Pharmacol* 557: 221–229.



55. Ukil A, Maity S, Karmakar S, Datta N, Vedasiromoni JR, et al. (2003) Curcumin, the major component of food flavour turmeric, reduces mucosal injury in trinitrobenzene sulphonic acid-induced colitis. *Brit J Pharmacol* 139: 209–218.
56. Zhang Z, Fan SH, Zheng YL, Jun L, Wu DM, et al. (2009) Purple sweet potato color attenuates oxidative stress and inflammatory response induced by D-galactose in mouse liver. *Food Chem Toxicol* 47: 496–501.
57. Schramm DD, Karim M, Schrader HR, Holt RR, Cardetti M, et al. (2003) Honey with high levels of antioxidants can provide protection to healthy human subjects. *J Agric Food Chem* 12: 1732–5.
58. Alvarez-Suarez JM, Giampieri F, Gonzalez-Paramas AM, Damiani E, Astolfi P, et al. (2012) Phenolics from monofloral honeys protect human erythrocyte membranes against oxidative damage. *Food Chem Toxicol* 50: 1508–1516.
59. Scalbert A, Williamson G (2000) Dietary intake and bioavailability of polyphenols. *J Nutr* 130: 2073–85.
60. Batumalaie K, Qvist R, Mohd Yusof K, Ismail IS, Sekaran SD (2013) The antioxidant effect of the Malaysian Gelam honey on pancreatic hamster cells cultured under hyperglycemic conditions. *Clin Exp Med* DOI 10.1007/s10238-013-0236-7.
61. Cuzzocrea S, Mazzon E, Di Paola R, Peli A, Bonato A, et al. (2006) The role of the peroxisome proliferator-activated receptor- $\alpha$  (PPAR- $\alpha$ ) in the regulation of acute inflammation. *J Leukocyte Biol* 79: 999–1010.
62. Chang HY, Sheu MJ, Yang CH, Lu TC, Chang YS, et al. (2011) Analgesic effects and the mechanisms of anti-Inflammation of Hispolon in mice. *Evid Based Compl Alt Med* 2011: 478246.
63. Goncalves DO, Calou IBF, Siqueira RP, Lopes AA, Leal LKA, et al. (2011) *In vivo* and *in vitro* anti-inflammatory and anti-nociceptive activities of lovastatin in rodents. *Braz J Med Biol Res* 44: 173–181.
64. Sindhu G, Ratheesh M, Shyni GL, Nambisan B, Helen A (2012) Anti-inflammatory and antioxidative effects of mucilage of *Trigonella foenum graecum* (Fenugreek) on adjuvant induced arthritic rats. *Int Immunopharmacol* 12: 205–211.
65. Cha DS, Eun JS, Jeon H (2011) Antiinflammatory and antinociceptive properties of the leaves of *Eriobotrya japonica*. *J Ethnopharmacol* 134: 305–312.
66. Collins RA, Grounds MD (2001) The role of tumor necrosis factor-alpha (TNF- $\alpha$ ) in skeletal muscle regeneration: Studies in TNF- $\alpha$  (–/–) and TNF- $\alpha$  (–/–)/LT- $\alpha$  (–/–) mice. *J Histochem Cytochem* 49: 989–1001.
67. Park SJ, Lee SC, Hong SH, Kim HM (2002) Degradation of IkappaBalpha in activated RAW264.7 cells is blocked by the phosphatidylinositol 3-kinase inhibitor LY294002. *Cell Biol Toxicol* 18: 121–130.
68. Nantel F, Denis D, Gordon R, Northey A, Cirino M, et al. (1999) Distribution and regulation of cyclooxygenase-2 in carrageenan-induced inflammation. *Brit J Pharmacol* 128: 853–859.
69. Cui X, Jin Y, Hofseth AB, Pena E, Habiger J, et al. (2010) Resveratrol suppresses colitis and colon cancer associated with colitis. *Cancer Prev Res* 3: 549–559.
